# Supplementary material for: mTORC1 induces plasma membrane depolarization and promotes preosteoblast senescence by regulating the sodium channel Scn1a
Source: PubMed Central journal article supplement (PMC8901653; doi:10.1038/s41413-022-00204-1), 2022-03-08
Supplement: 41413_2022_204_MOESM1_ESM.pdf [file 41413_2022_204_MOESM1_ESM.pdf]

**mTORC1 induces plasma membrane depolarization and promotes  
preosteoblast senescence through regulating the sodium channel**

**Scn1a**

Ajuan Chen et al.

**Inventory of Supplementary information**

**Supplementary Figures (Supplementary Figures 1-13)**

**Legends to Supplementary Figures**

**Supplementary Table (Supplementary Table 1)**

## Supplementary Figure 1

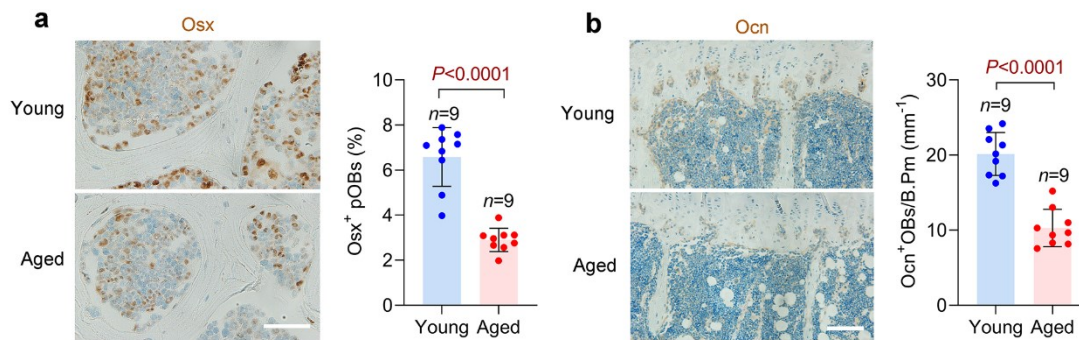

### Supplementary Fig.1 Old mice present lower preosteoblast and osteoblast

**numbers than young mice. (a)** Immunohistochemical (IHC) staining for osterix (Osx) in the tibias of young (9 month old) and aged (18 month old) C57 wildtype mice. Scale bar: 100  $\mu\text{m}$ . Quantification of Osx-positive preosteoblasts (Osx<sup>+</sup> pOBs) relative to total cells (%) in the bone marrow is shown. **(b)** IHC staining for osteocalcin (Ocn) in tibias of the mice in a. Scale bar: 500  $\mu\text{m}$ . Ocn-positive mature osteoblasts (Ocn<sup>+</sup> OBs) on the bone surface were measured as cells per millimeter of perimeter in sections (/B.Pm) ( $\text{mm}^{-1}$ ). Data are shown as mean  $\pm$  SD. The numbers of samples (n) are indicated in each figure panel. *P* values were determined by two-tailed Student's *t* test for single comparisons.

## Supplementary Figure 2

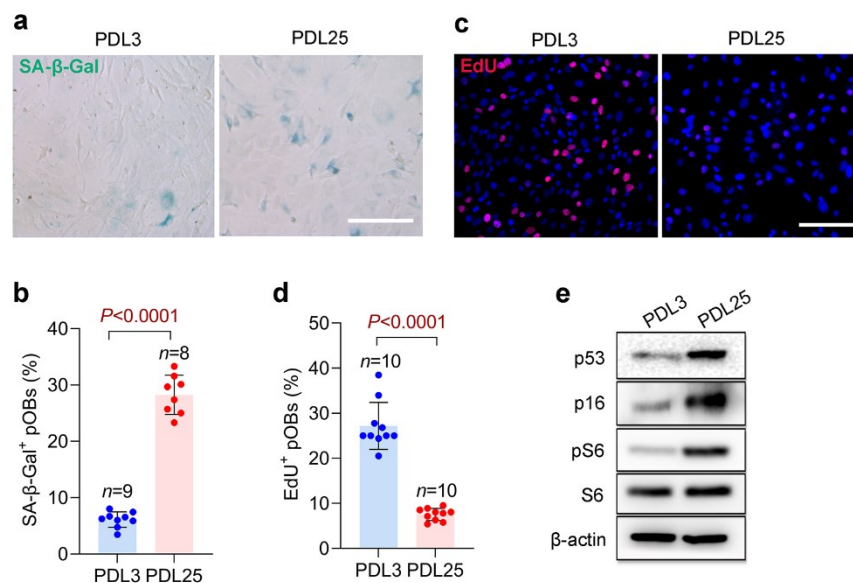

### Supplementary Fig. 2 mTORC1 is activated in replicative senescent osteoblasts.

(a) Primary calvarial osteoblasts at population doubling level (PDL) 3 and 25 were stained with SA-β-gal. Scale bar, 100 μm. (b) Quantification of SA-β-gal positive osteoblasts relative to total osteoblasts. (c) Immunostaining of EdU (red) in the cells and (d) quantitative analysis of EdU<sup>+</sup> cells relative to total cells. Scale bar, 100 μm in c. (e) Western blot analysis of senescent marker expression (p53 and p16) and mTORC1 activity (pS6(Ser235/236)) in the cells. Data are shown as mean ± SD. The numbers of samples (n) are indicated in each figure panel. *P* values were determined by two-tailed Student's *t* test for single comparisons.

### Supplementary Figure 3

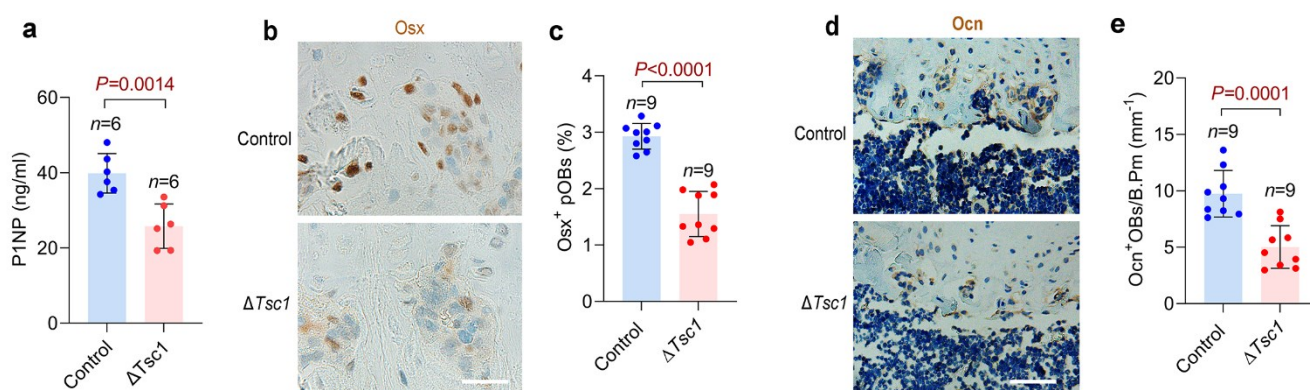

### Supplementary Fig. 3 mTORC1 activation in preosteoblast results in reduced

**osteoblast number and activity in old mice. (a)** Serum levels of P1NP of 18-month-

old  $\Delta Tsc1$  mice and their littermate controls determined by ELISA analysis. **(b)** IHC staining for Osx in the tibias of 18-month-old  $\Delta Tsc1$  mice and their littermate

controls. Scale bar: 50  $\mu$ m. **(c)** Quantification of Osx-positive preosteoblasts (Osx<sup>+</sup>

pOBs) relative to total cells in the bone marrow. **(d)** IHC staining for Ocn in the tibias

of 18-month-old  $\Delta Tsc1$  mice and controls. Scale bar: 100  $\mu$ m. **(e)** Ocn-positive mature

osteoblasts (Ocn<sup>+</sup>OBs) on the bone surface were measured as cells per millimeter of perimeter in sections (/B.Pm). Data are shown as mean  $\pm$  SD. The numbers of samples

(n) are indicated in each figure panel.  $P$  values were determined by two-tailed

Student's t test for single comparisons.

## Supplementary Figure 4

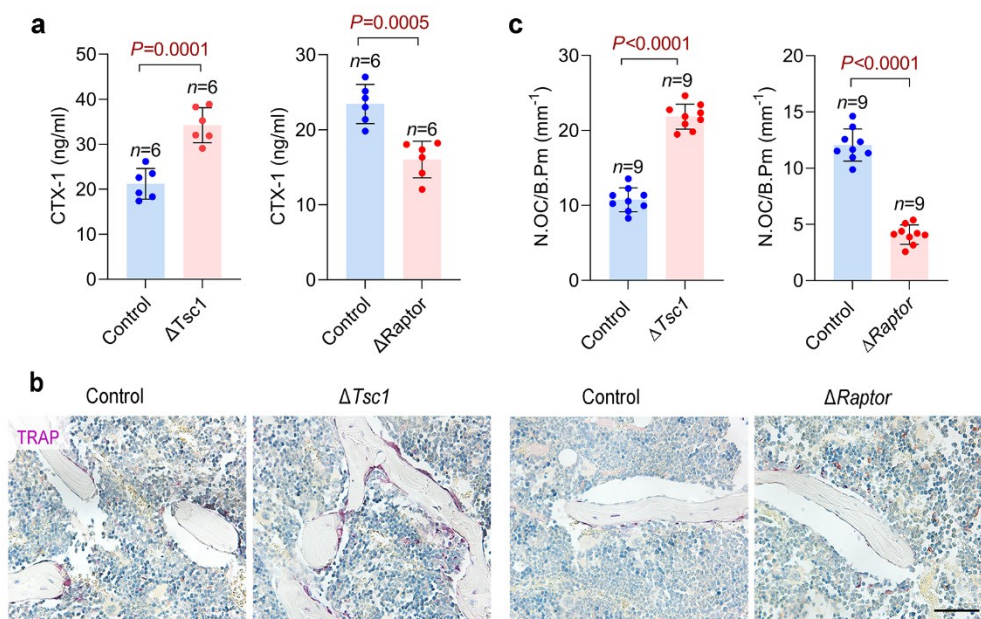

**Supplementary Fig. 4 Hyperactive preosteoblastic mTORC1 increases, but inactive mTORC1 decreases, osteoclast formation and activity.** (a) Serum levels of CTX-1 in 18-month-old  $\Delta Tsc1$ ,  $\Delta Raptor$  and their control mice determined by ELISA analysis. (b) TRAP staining of distal femurs from 18-month-old  $\Delta Tsc1$ ,  $\Delta Raptor$  and their control mice. Scale bar, 200  $\mu\text{m}$ . (c) The number of osteoclasts (N.OC) on the bone surface was measured as cells per millimeter of perimeter in sections (/B.Pm). Data are shown as mean  $\pm$  SD. The numbers of samples (n) are indicated in each figure panel. P values were determined by two-tailed Student's t test for single comparisons.

## Supplementary Figure 5

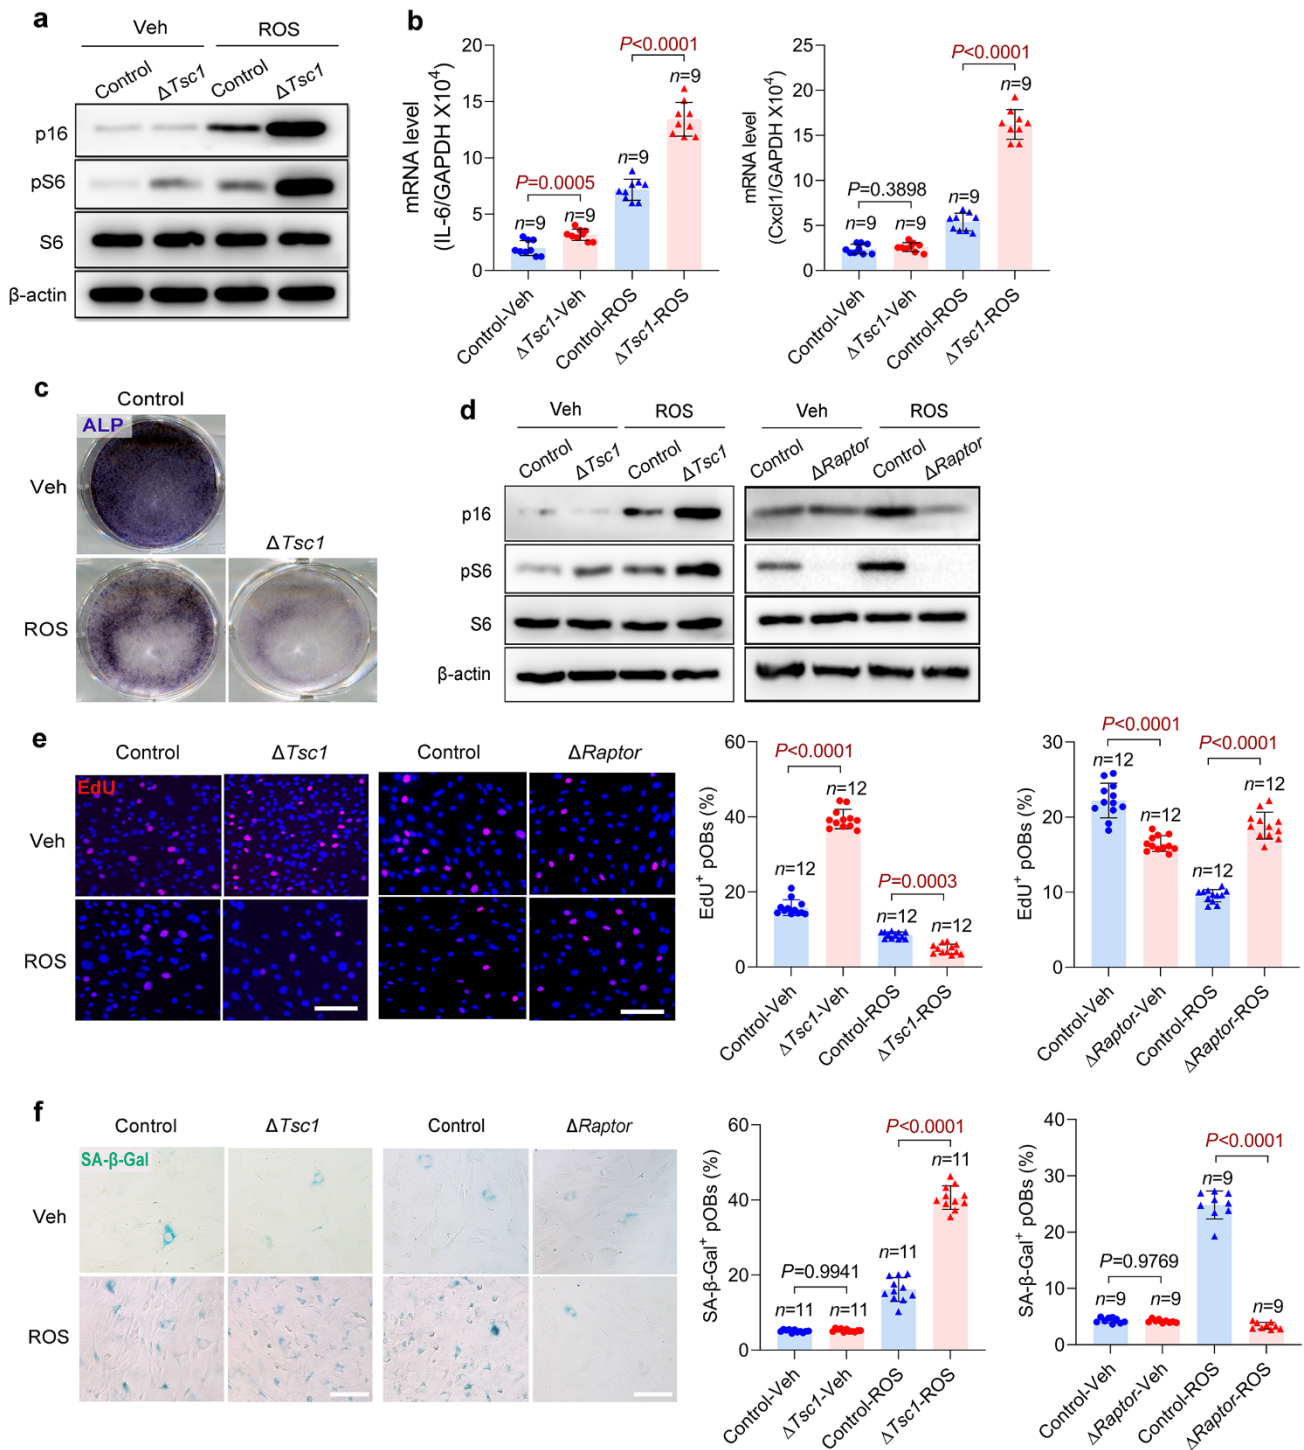

### Supplementary Fig. 5 Hyperactive mTORC1 accelerates, but inactive mTORC1

prevents, preosteoblast senescence *in vitro*. (a) In primary calvarial osteoblasts

isolated from neonates  $\Delta Tsc1$  and  $Tsc1^{fl/fl}$  mice, senescence was induced by ROS. After 3 days, the cells were analyzed for senescence marker (p16 and p53) expression and mTORC1 activity (pS6) with western blotting. **(b)** qPCR analysis of IL-6 and Cxcl1 mRNA in the primary osteoblasts in a. **(c)** The cells were then induced to undergo osteogenic differentiation, and subjected to ALP staining on day 7 after differentiation induction. Primary osteoblasts isolated from long bone of  $\Delta Tsc1$  and  $\Delta Raptor$  mice were subjected to senescence induction by ROS. The cells were then subjected to analysis for p16 and pS6 expression **(d)**, EdU immunostaining and quantitative analysis of EdU<sup>+</sup> cells **(e)**, and SA- $\beta$ -gal staining and quantification of SA- $\beta$ -gal<sup>+</sup> cells **(f)**. Scale bar, 100  $\mu$ m in e. Data are shown as mean  $\pm$  SD. The numbers of samples (n) are indicated in each figure panel. *P* values were determined by two-tailed Student's *t* test for single comparisons.

## Supplementary Figure 6

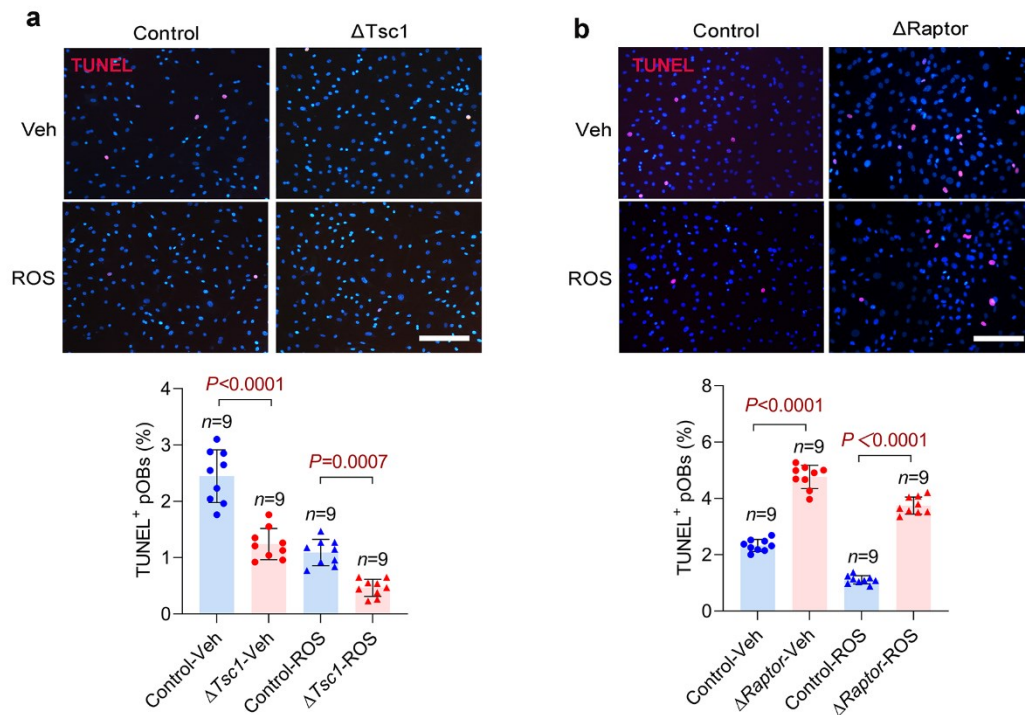

### Supplementary Fig. 6 mTORC1 exerts consistent effects on apoptosis in

**replicative and senescent preosteoblasts.** In primary calvarial osteoblasts isolated

from neonates (a)  $\Delta Tsc1$  and (b)  $\Delta Raptor$  mice, senescence was induced by ROS. The

cells were then subjected to TUNEL staining and quantification of TUNEL<sup>+</sup> cells.

Data are shown as mean  $\pm$  SD. The numbers of samples (n) are indicated in each

figure panel. P values were determined by two-tailed Student's t test for single

comparisons.



## Supplementary Figure 7

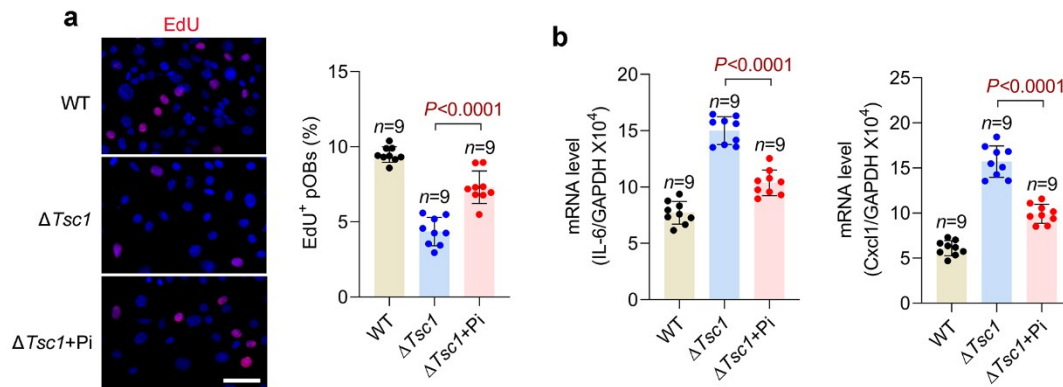

### Supplementary Fig. 7 Pinacidil prevents depolarization and alleviates senescence

#### in $\Delta Tsc1$ preosteoblasts. (a) Immunostaining of EdU in senescent $\Delta Tsc1$

preosteoblasts treated with pinacidil (Pi) and quantitative analysis of EdU<sup>+</sup> cells

relative to total cells. Scale bar, 50  $\mu m$ . (b) qPCR analysis of Cxcl1 and IL-6 mRNA

in cells in a. Data are shown as mean  $\pm$  SD. The numbers of samples (n) are indicated

in each figure panel. *P* values were determined by two-tailed Student's *t* test for single

comparisons.

## Supplementary Figure 8

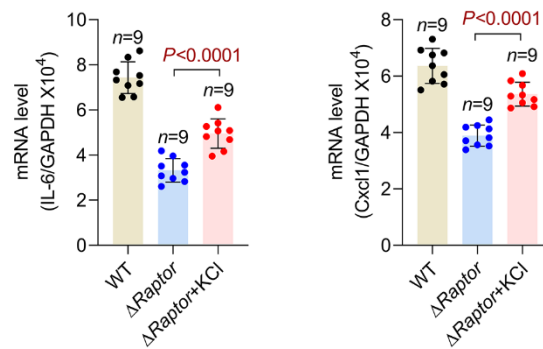

### Supplementary Fig. 8 qPCR analysis of IL-6 and Cxcl1 mRNA in senescent

**ΔRaptor** preosteoblasts treated with KCl. Data are shown as mean ± SD. The

numbers of samples (n) are indicated. *P* values were determined by two-tailed

Student's t test for single comparisons.

## Supplementary Figure 9

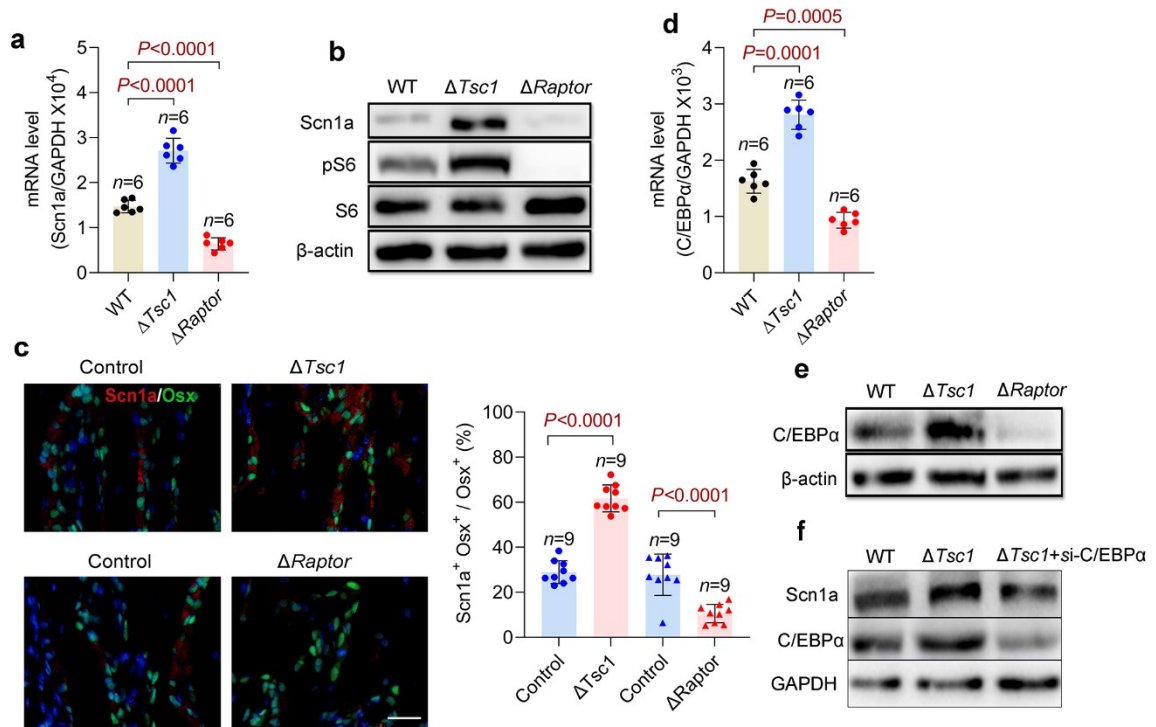

### Supplementary Fig. 9 mTORC1 positively regulated Scn1a via C/EBPα. (a)

qPCR and (b) western blot analysis of Scn1a expression in  $\Delta Tsc1$  and  $\Delta Raptor$  preosteoblasts. (c) Immunostaining of Scn1a and Osx in  $\Delta Tsc1$  and  $\Delta Raptor$  mice bone. Scale bar, 50  $\mu\text{m}$ . Quantitative analysis of Scn1a<sup>+</sup> preosteoblasts (Scn1a<sup>+</sup> Osx<sup>+</sup>) relative to total Osx<sup>+</sup> preosteoblasts. (d) qPCR and (e) western blot analysis of C/EBPα expression in  $\Delta Tsc1$  and  $\Delta Raptor$  preosteoblasts. (f)  $\Delta Tsc1$  osteoblasts were subjected to C/EBPα knockdown with siRNA and subjected to western blot analysis of Scn1a expression. Data are shown as mean  $\pm$  SD. The numbers of samples (n) are indicated. *P* values were determined by two-tailed Student's *t* test for single comparisons.

## Supplementary Figure 10

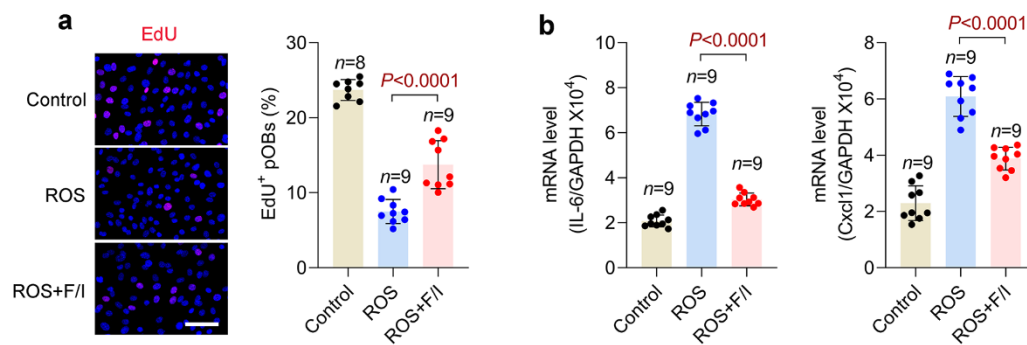

**Supplementary Fig. 10 PKA activator abolished the senescent phenotype of preosteoblast induced by ROS.** (a) ROS-induced senescent wildtype preosteoblasts were treated with F/I (forskolin + IBMx, PKA activator) or left untreated. The cells were immunostained with EdU and analyzed for of EdU<sup>+</sup> cells relative to total cells. Scale bar, 100  $\mu$ m. (b) qPCR analysis of IL-6 and Cxcl1 mRNA in cells in a. Data are shown as mean  $\pm$  SD. The numbers of samples (n) are indicated in each figure panel. *P* values were determined by two-tailed Student's *t* test for single comparisons.

## Supplementary Figure 11

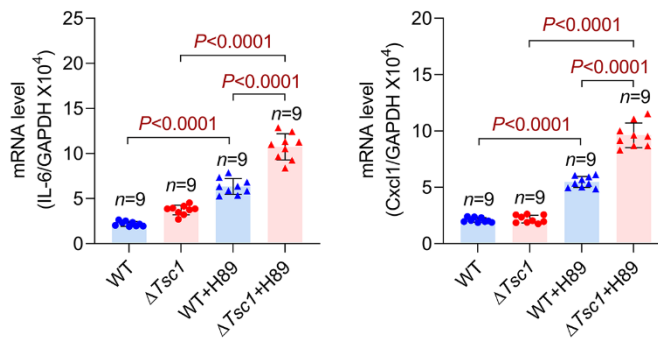

**Supplementary Fig. 11 qPCR analysis of IL-6 and Cxcl1 mRNA in replicative WT and  $\Delta Tsc1$  osteoblasts treated with H-89 (PKA inhibitor).** Data are shown as mean  $\pm$  SD. The numbers of samples (n) are indicated. *P* values were determined by two-tailed Student's *t* test for single comparisons.

## Supplementary Figure 12

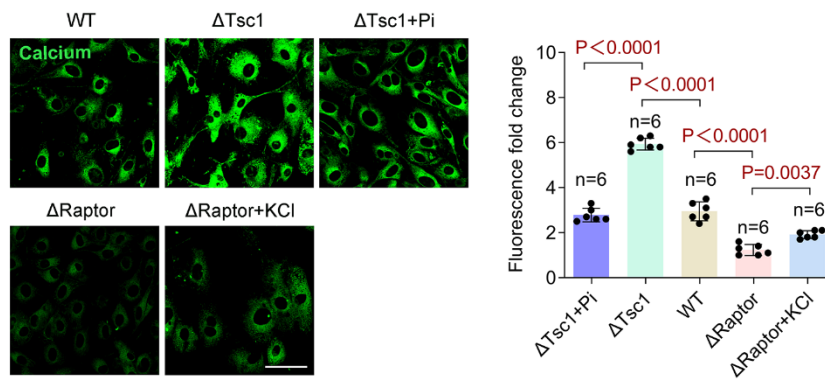

### Supplementary Fig. 12 Cytosolic calcium levels change with the membrane

**potential in preosteoblasts obtained from long bones.  $\Delta Tsc1$  and  $\Delta Raptor$**

preosteoblasts obtained from long bones were subjected to ROS induced senescence, treated with pinacidil (Pi) or KCl, and incubated with the Fluoforte probe to measure the relative cytosolic calcium levels. Calcium imaging data were quantified by normalizing the values to those of senescent wildtype (WT) preosteoblasts. Scale bar, 50  $\mu m$ . Data are shown as mean  $\pm$  SD. The numbers of samples (n) are indicated. *P* values were determined by two-tailed Student's *t* test for single comparisons.

## Supplementary Figure 13 Uncropped versions of the gel images.

Figure1g

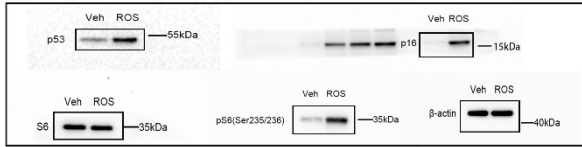

Figure2a

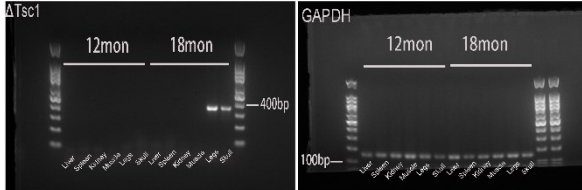

Figure4a

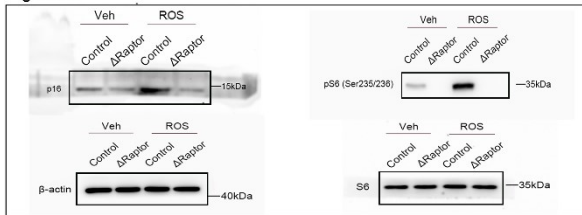

Figure6c

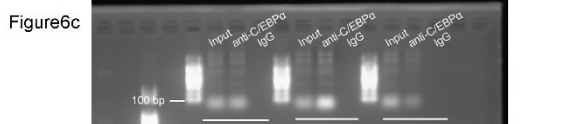

Sup.Figure2e

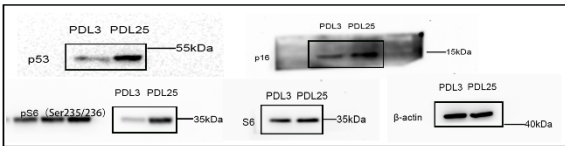

Sup.Figure5a

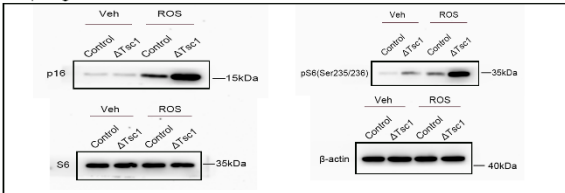

Sup.Figure5d

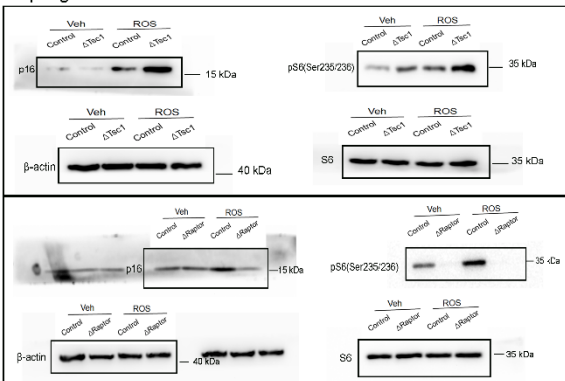

Figure6d

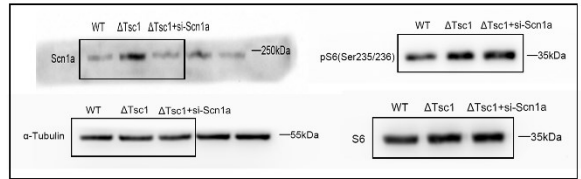

Figure8e

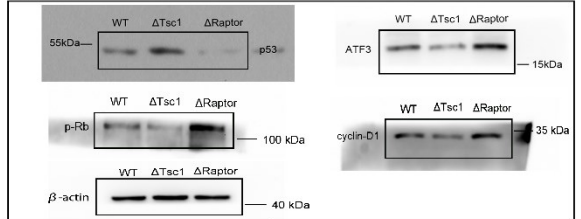

Figure8g

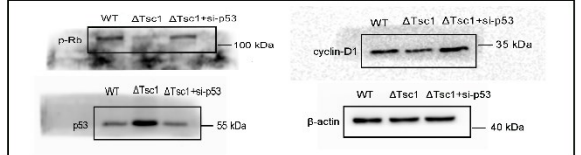

Figure8i

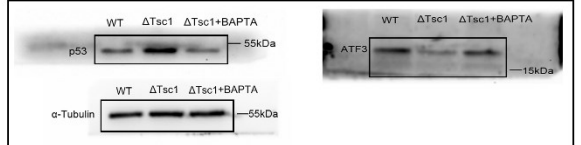

Sup.Figure9b

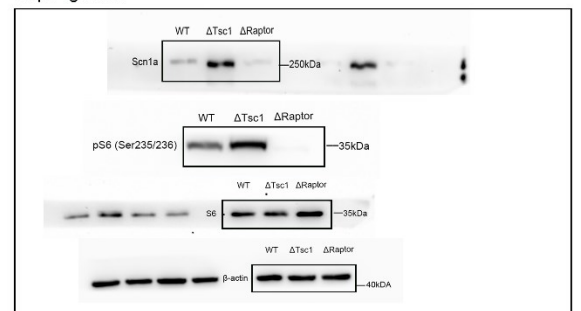

Sup.Figure9e

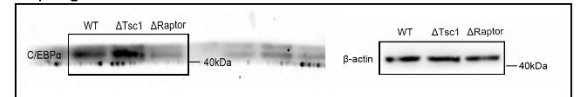

Sup.Figure9f

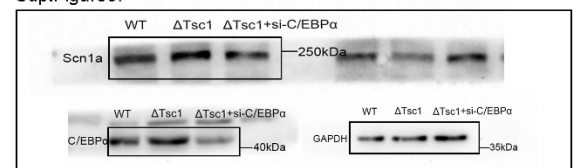

**Supplementary Table**

**Supplementary Table 1. Nucleotide sequences of primers used for PCR**

| Gene                             | Strand  | Sequence (5' to 3' )       |
|----------------------------------|---------|----------------------------|
| Osx-Cre                          | Forward | TACCAGAAGCGACCACTTGAGC     |
|                                  | Reverse | GCACACAGACAGGAGCATCTTC     |
| <i>Tsc1</i> <sup>lox/lox</sup>   | Forward | GTCACGACCGTAGGAGAAGC       |
|                                  | Reverse | GAATCAACCCACAGAGCAT        |
| Recombined<br><i>Tsc1</i>        | Forward | AGGAGGCCTCTTCTGCTACC       |
|                                  | Reverse | TGGGTCCTGACCTATCTCCTA      |
| <i>Raptor</i> <sup>lox/lox</sup> | Forward | CTCAGTAGTGGTATGTGCTCAG     |
|                                  | Reverse | GGGTACAGTATGTCAGCACAG      |
| <i>C/EBP<math>\alpha</math></i>  | Forward | TGGACAAGAACAGCAACGAG       |
|                                  | Reverse | TCACTGGTCAACTCCAGCAC       |
| <i>IL-6</i>                      | Forward | GCTACCAAACCTGGATATAATCAGGA |
|                                  | Reverse | CCAGGTAGCTATGGTACTCCAGAA   |
| <i>Cxcl1</i>                     | Forward | CTGGGATTCACCTCAAGAACATC    |
|                                  | Reverse | CAGGGTCAAGGCAAGCCTC        |
| <i>Scn1a</i>                     | Forward | AGCCTATCCCTCGACCTGGA       |
|                                  | Reverse | CTGGTCATCCGTTTCCACCA       |
| <i>Scn1a</i> 5'-UE               | Forward | TGCTTGCTGCTGCCAATACT       |
|                                  | Reverse | GTTTCCACAGGCCGGTAGTG       |
| <i>GAPDH</i>                     | Forward | GCACAGTCAAGGCCGAGAAT       |
|                                  | Reverse | GCCTTCTCCATGGTGGTGAA       |
